# Supplementary material for: The Coupling of a High-efficiency Aerosol Collector with Electrospray Ionisation/Orbitrap Mass Spectrometry as a novel tool for Real-time Chemical Characterisation of Fine and Ultrafine Particles
Source: Copernicus journal article supplement (doi:10.5194/amt-2024-192), 2025-01-03
Supplement: Supplementary file 1 [file amt-2024-192-supplement.pdf]

**The Coupling of a High-efficiency Aerosol Collector with Electrospray  
Ionisation/Orbitrap Mass Spectrometry as a novel tool for Real-time Chemical  
Characterisation of Fine and Ultrafine Particles**

Yik-Sze Lau<sup>1</sup>, Zoran Ristovski<sup>1</sup>, Branka Miljevic<sup>1\*</sup>

<sup>1</sup> International Laboratory for Air Quality and Health, School of Earth and Atmospheric  
Sciences, Queensland University of Technology, Brisbane, Australia

\*Corresponding author:

**Professor Branka Miljevic, Email: [b.miljevic@qut.edu.au](mailto:b.miljevic@qut.edu.au)**

## Supporting Information

### **Sensitivity and limit of detection (LOD) calculations:**

The sensitivity of a certain compound in the HEAC/ESI/Orbitrap-MS system is determined by finding the slope of the best-fit line of the calibration curve. To find the best-fit line of the calibration curve, the generalised least-squares estimation algorithm by York et al. (2004) was used due to uncertainties in both x- and y-directions. After obtaining the slope, the limit of detection (LOD) of the compound by the HEAC/ESI/Orbitrap-MS was determined using equation (1) shown below:

$$\frac{S}{N} = \frac{k_i \times LOD}{\sigma} \quad (1)$$

where  $k_i$  is the sensitivity for the specific compound (given by the slope of the best-fit line),  $\sigma$  is the standard deviation of the background signal for the particular compound (in the blank sample), and  $S/N$  is the signal-to-noise ratio of the instrument (Zhang et al., 2016).

### **Data analysis:**

All data analyses were done using Rstudio version 4.2.3 (R Development Core Team, 2023). The York-fit algorithm used in sensitivity and LOD calculation was run by the “IsoplotR” package (Vermeesch, 2018), and figures were created by the “ggplot2” package (Wickham, 2016). SMPS data was exported by Aerosol Instrument Manager (AIM) software (version 9.0.0.0), developed by TSI incorporated. Orbitrap-MS data was initially processed by the Thermo Xcalibur software (Thermo Fisher, USA). When necessary, the raw data was converted into mzXML format by RawConverter (He et al., 2015) and analysed using the “xcms” package in Rstudio (Smith et al., 2006).

## **$\alpha$ -pinene ozonolysis product identification**

The identification of  $\alpha$ -pinene ozonolysis products were done by MZmine (ver. 3.9.0). The raw data in .raw (Thermo Fisher) format was directly imported to MZmine. After importing the raw data, “Mass detection” was carried out to identify all the ion present in every mass spectrum. The parameters set for mass detection are as follows:

Retention time: 0 to 115 minutes (Full range)

Polarity: negative

Mass detector: Exact mass

Noise level: 1.0

m/z tolerance: 5.0E-4 m/z or 1 ppm

In particular, the noise level was set to 1 to capture all possible ion signals. A mass list of around 200,000 ions with unique exact mass was generated. After that, A “feature detection” algorithm was applied to the raw data to construct the time series of all ions in the mass list that fulfill the criteria set in the algorithm. The parameters set in the feature detection algorithm are as follow:

Retention time: 0 to 115 minutes (full range)

Polarity: negative

Minimum consecutive scans: 2

Minimum intensity for consecutive scans: 0

Minimum absolute height: 5.0

m/z tolerance (scan-to-scan): 0.002 m/z or 5.0 ppm

The current setting screened out a large amount of noise ions (~90%) in the mass list, and a feature list containing the time series of 20004 ions was generated. These time series were then individually inspected. Ions were assigned as “product ions” if their signals showed an increase when the HEAC was sampling from the reaction bottle. The above workflow

identified over three hundred product ions in the fast  $\alpha$ -pinene injection experiment, including isotope signals of some product ions.

**Table S1.** Details and selected physical properties of compounds used for the sensitivity and LOD characterisation experiment.

| Compound          | Structure                                                                           | Chemical formula                                | Exact mass | m/z [M-H] <sup>-</sup> | Water solubility            | Vapor pressure (Pa at 25°C)* |
|-------------------|-------------------------------------------------------------------------------------|-------------------------------------------------|------------|------------------------|-----------------------------|------------------------------|
| Adonitol          | 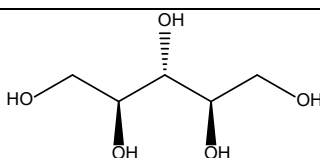   | C <sub>5</sub> H <sub>12</sub> O <sub>5</sub>   | 152.0685   | 151.0612               | 6.42 x 10 <sup>5</sup> mg/L | 1.51                         |
| Erythritol        |    | C <sub>4</sub> H <sub>10</sub> O <sub>4</sub>   | 122.0579   | 121.0506               | 6.1x10 <sup>5</sup> mg/L    | 6.36x10 <sup>-4</sup>        |
| Sucrose           |   | C <sub>12</sub> H <sub>22</sub> O <sub>11</sub> | 342.1162   | 341.1089               | 2.1x10 <sup>6</sup> mg/L    | 2.24 x 10 <sup>-12</sup>     |
| Trehalose         |  | C <sub>12</sub> H <sub>22</sub> O <sub>11</sub> | 342.1162   | 341.1089               | 6.89x10 <sup>6</sup> mg/L   | 2.23x10 <sup>-12</sup>       |
| Tricarballic acid |  | C <sub>6</sub> H <sub>8</sub> O <sub>6</sub>    | 176.0321   | 175.0248               | 500 mg/ml                   | 3.88 x 10 <sup>-3</sup>      |
| Vanillic acid     |  | C <sub>8</sub> H <sub>8</sub> O <sub>4</sub>    | 168.0423   | 167.0350               | 1500 mg/L                   | 1.89 x 10 <sup>-2</sup>      |

\* Vapor pressure estimation was carried out by EPI Suite software using the AEROWIN v1.00 programme.

**Table S2.** Sensitivity and LOD of the chemical compounds analysed in the current study. Uncertainties reported in the table refer to the standard errors of the results.

| <b>Compound</b>   | <b>Sensitivity<br/>(<math>10^4</math> counts <math>m^3 \mu g^{-1}</math>)</b> | <b>LOD<br/>(<math>ng m^{-3}</math>)</b> |
|-------------------|-------------------------------------------------------------------------------|-----------------------------------------|
| Adonitol          | $0.64 \pm 0.10$                                                               | $14 \pm 2.3$                            |
| Erythritol        | $0.62 \pm 0.078$                                                              | $1.1 \pm 0.14$                          |
| Sucrose           | $0.68 \pm 0.14$                                                               | $4.5 \pm 0.91$                          |
| Trehalose         | $0.53 \pm 0.11$                                                               | $1.9 \pm 0.38$                          |
| Tricarballic acid | $1.9 \pm 0.21$                                                                | $65 \pm 7.4$                            |
| Vanillic acid     | $1.8 \pm 0.18$                                                                | $36 \pm 3.6$                            |

**Table S3.** Sensitivity and LOD of vanillic acid, TCA and adonitol in different working fluids.

| <b>Compound</b> | <b>Working fluid</b> | <b>Sensitivity<br/>(<math>10^4</math> counts <math>m^3 \mu g^{-1}</math>)</b> | <b>LOD<br/>(<math>ng m^{-3}</math>)</b> |
|-----------------|----------------------|-------------------------------------------------------------------------------|-----------------------------------------|
| Adonitol        | H <sub>2</sub> O     | $0.86 \pm 0.097$                                                              | $17 \pm 1.9$                            |
|                 | MeOH                 | $0.38 \pm 0.023$                                                              | $20 \pm 1.2$                            |
|                 | ACN                  | $0.50 \pm 0.030$                                                              | $42 \pm 2.6$                            |
| TCA             | H <sub>2</sub> O     | $1.6 \pm 0.12$                                                                | $22 \pm 1.7$                            |
|                 | MeOH                 | $0.65 \pm 0.048$                                                              | $26 \pm 1.9$                            |
|                 | ACN                  | $4.7 \pm 0.30$                                                                | $12 \pm 0.75$                           |
| Vanillic acid   | H <sub>2</sub> O     | $2.6 \pm 0.25$                                                                | $5.9 \pm 0.58$                          |
|                 | MeOH                 | $2.7 \pm 0.25$                                                                | $7.1 \pm 0.67$                          |
|                 | ACN                  | $6.6 \pm 0.60$                                                                | $2.1 \pm 0.19$                          |

**Table S4.** The list of products identified in the  $\alpha$ -pinene ozonolysis experiments.

| Molecular Mass | No.C | No.H | No.O | Formula | DBE* |
|----------------|------|------|------|---------|------|
| 74.001         | 2    | 2    | 3    | C2H2O3  | 2    |
| 58.043         | 3    | 6    | 1    | C3H6O   | 1    |
| 72.022         | 3    | 4    | 2    | C3H4O2  | 2    |
| 74.038         | 3    | 6    | 2    | C3H6O2  | 1    |
| 88.017         | 3    | 4    | 3    | C3H4O3  | 2    |
| 104.012        | 3    | 4    | 4    | C3H4O4  | 2    |
| 70.043         | 4    | 6    | 1    | C4H6O   | 2    |
| 72.059         | 4    | 8    | 1    | C4H8O   | 1    |
| 84.022         | 4    | 4    | 2    | C4H4O2  | 3    |
| 86.038         | 4    | 6    | 2    | C4H6O2  | 2    |
| 100.017        | 4    | 4    | 3    | C4H4O3  | 3    |
| 102.033        | 4    | 6    | 3    | C4H6O3  | 2    |
| 118.028        | 4    | 6    | 4    | C4H6O4  | 2    |
| 120.044        | 4    | 8    | 4    | C4H8O4  | 1    |
| 82.043         | 5    | 6    | 1    | C5H6O   | 3    |
| 84.059         | 5    | 8    | 1    | C5H8O   | 2    |
| 86.075         | 5    | 10   | 1    | C5H10O  | 1    |
| 96.022         | 5    | 4    | 2    | C5H4O2  | 4    |
| 98.038         | 5    | 6    | 2    | C5H6O2  | 3    |
| 100.054        | 5    | 8    | 2    | C5H8O2  | 2    |
| 112.017        | 5    | 4    | 3    | C5H4O3  | 4    |
| 114.033        | 5    | 6    | 3    | C5H6O3  | 3    |
| 128.012        | 5    | 4    | 4    | C5H4O4  | 4    |
| 130.028        | 5    | 6    | 4    | C5H6O4  | 3    |
| 132.044        | 5    | 8    | 4    | C5H8O4  | 2    |
| 144.007        | 5    | 4    | 5    | C5H4O5  | 4    |
| 146.023        | 5    | 6    | 5    | C5H6O5  | 3    |
| 148.039        | 5    | 8    | 5    | C5H8O5  | 2    |
| 162.018        | 5    | 6    | 6    | C5H6O6  | 3    |
| 164.034        | 5    | 8    | 6    | C5H8O6  | 2    |
| 96.059         | 6    | 8    | 1    | C6H8O   | 3    |
| 98.075         | 6    | 10   | 1    | C6H10O  | 2    |
| 110.038        | 6    | 6    | 2    | C6H6O2  | 4    |
| 112.054        | 6    | 8    | 2    | C6H8O2  | 3    |
| 114.070        | 6    | 10   | 2    | C6H10O2 | 2    |
| 126.033        | 6    | 6    | 3    | C6H6O3  | 4    |
| 128.049        | 6    | 8    | 3    | C6H8O3  | 3    |
| 142.028        | 6    | 6    | 4    | C6H6O4  | 4    |
| 144.044        | 6    | 8    | 4    | C6H8O4  | 3    |
| 146.060        | 6    | 10   | 4    | C6H10O4 | 2    |
| 108.059        | 7    | 8    | 1    | C7H8O   | 4    |
| 110.075        | 7    | 10   | 1    | C7H10O  | 3    |
| 112.091        | 7    | 12   | 1    | C7H12O  | 2    |
| 124.054        | 7    | 8    | 2    | C7H8O2  | 4    |
| 126.070        | 7    | 10   | 2    | C7H10O2 | 3    |

|         |   |    |   |         |   |
|---------|---|----|---|---------|---|
| 128.086 | 7 | 12 | 2 | C7H12O2 | 2 |
| 138.033 | 7 | 6  | 3 | C7H6O3  | 5 |
| 140.049 | 7 | 8  | 3 | C7H8O3  | 4 |
| 142.065 | 7 | 10 | 3 | C7H10O3 | 3 |
| 144.081 | 7 | 12 | 3 | C7H12O3 | 2 |
| 146.097 | 7 | 14 | 3 | C7H14O3 | 1 |
| 154.028 | 7 | 6  | 4 | C7H6O4  | 5 |
| 156.044 | 7 | 8  | 4 | C7H8O4  | 4 |
| 158.060 | 7 | 10 | 4 | C7H10O4 | 3 |
| 160.076 | 7 | 12 | 4 | C7H12O4 | 2 |
| 162.092 | 7 | 14 | 4 | C7H14O4 | 1 |
| 174.055 | 7 | 10 | 5 | C7H10O5 | 3 |
| 176.071 | 7 | 12 | 5 | C7H12O5 | 2 |
| 190.050 | 7 | 10 | 6 | C7H10O6 | 3 |
| 192.066 | 7 | 12 | 6 | C7H12O6 | 2 |
| <hr/>   |   |    |   |         |   |
| 122.075 | 8 | 10 | 1 | C8H10O  | 4 |
| 124.091 | 8 | 12 | 1 | C8H12O  | 3 |
| 126.107 | 8 | 14 | 1 | C8H14O  | 2 |
| 138.070 | 8 | 10 | 2 | C8H10O2 | 4 |
| 140.086 | 8 | 12 | 2 | C8H12O2 | 3 |
| 142.102 | 8 | 14 | 2 | C8H14O2 | 2 |
| 154.065 | 8 | 10 | 3 | C8H10O3 | 4 |
| 156.081 | 8 | 12 | 3 | C8H12O3 | 3 |
| 170.060 | 8 | 10 | 4 | C8H10O4 | 4 |
| 172.076 | 8 | 12 | 4 | C8H12O4 | 3 |
| 174.092 | 8 | 14 | 4 | C8H14O4 | 2 |
| 186.055 | 8 | 10 | 5 | C8H10O5 | 4 |
| 188.071 | 8 | 12 | 5 | C8H12O5 | 3 |
| 190.087 | 8 | 14 | 5 | C8H14O5 | 2 |
| 202.050 | 8 | 10 | 6 | C8H10O6 | 4 |
| 204.066 | 8 | 12 | 6 | C8H12O6 | 3 |
| 206.082 | 8 | 14 | 6 | C8H14O6 | 2 |
| 220.061 | 8 | 12 | 7 | C8H12O7 | 3 |
| 222.077 | 8 | 14 | 7 | C8H14O7 | 2 |
| <hr/>   |   |    |   |         |   |
| 136.091 | 9 | 12 | 1 | C9H12O  | 4 |
| 138.107 | 9 | 14 | 1 | C9H14O  | 3 |
| 140.123 | 9 | 16 | 1 | C9H16O  | 2 |
| 152.086 | 9 | 12 | 2 | C9H12O2 | 4 |
| 154.102 | 9 | 14 | 2 | C9H14O2 | 3 |
| 168.081 | 9 | 12 | 3 | C9H12O3 | 4 |
| 170.097 | 9 | 14 | 3 | C9H14O3 | 3 |
| 184.076 | 9 | 12 | 4 | C9H12O4 | 4 |
| 186.092 | 9 | 14 | 4 | C9H14O4 | 3 |
| 188.108 | 9 | 16 | 4 | C9H16O4 | 2 |
| 198.055 | 9 | 10 | 5 | C9H10O5 | 5 |
| 200.071 | 9 | 12 | 5 | C9H12O5 | 4 |
| 202.087 | 9 | 14 | 5 | C9H14O5 | 3 |
| 204.103 | 9 | 16 | 5 | C9H16O5 | 2 |

|         |    |    |   |          |   |
|---------|----|----|---|----------|---|
| 218.082 | 9  | 14 | 6 | C9H14O6  | 3 |
| 220.098 | 9  | 16 | 6 | C9H16O6  | 2 |
| 234.077 | 9  | 14 | 7 | C9H14O7  | 3 |
| 164.086 | 10 | 12 | 2 | C10H12O2 | 5 |
| 168.118 | 10 | 16 | 2 | C10H16O2 | 3 |
| 180.081 | 10 | 12 | 3 | C10H12O3 | 5 |
| 182.097 | 10 | 14 | 3 | C10H14O3 | 4 |
| 184.113 | 10 | 16 | 3 | C10H16O3 | 3 |
| 196.076 | 10 | 12 | 4 | C10H12O4 | 5 |
| 198.092 | 10 | 14 | 4 | C10H14O4 | 4 |
| 200.108 | 10 | 16 | 4 | C10H16O4 | 3 |
| 202.124 | 10 | 18 | 4 | C10H18O4 | 2 |
| 212.071 | 10 | 12 | 5 | C10H12O5 | 5 |
| 216.103 | 10 | 16 | 5 | C10H16O5 | 3 |
| 218.119 | 10 | 18 | 5 | C10H18O5 | 2 |
| 228.066 | 10 | 12 | 6 | C10H12O6 | 5 |
| 230.082 | 10 | 14 | 6 | C10H14O6 | 4 |
| 232.098 | 10 | 16 | 6 | C10H16O6 | 3 |
| 234.114 | 10 | 18 | 6 | C10H18O6 | 2 |
| 248.093 | 10 | 16 | 7 | C10H16O7 | 3 |
| 264.088 | 10 | 16 | 8 | C10H16O8 | 3 |
| 212.108 | 11 | 16 | 4 | C11H16O4 | 4 |
| 214.124 | 11 | 18 | 4 | C11H18O4 | 3 |
| 226.087 | 11 | 14 | 5 | C11H14O5 | 5 |
| 228.103 | 11 | 16 | 5 | C11H16O5 | 4 |
| 230.119 | 11 | 18 | 5 | C11H18O5 | 3 |
| 280.120 | 11 | 20 | 8 | C11H20O8 | 2 |
| 210.129 | 12 | 18 | 3 | C12H18O3 | 4 |
| 222.092 | 12 | 14 | 4 | C12H14O4 | 6 |
| 226.124 | 12 | 18 | 4 | C12H18O4 | 4 |
| 238.087 | 12 | 14 | 5 | C12H14O5 | 6 |
| 242.119 | 12 | 18 | 5 | C12H18O5 | 4 |
| 238.124 | 13 | 18 | 4 | C13H18O4 | 5 |
| 254.119 | 13 | 18 | 5 | C13H18O5 | 5 |
| 252.140 | 14 | 20 | 4 | C14H20O4 | 5 |
| 270.151 | 14 | 22 | 5 | C14H22O5 | 4 |
| 282.151 | 15 | 22 | 5 | C15H22O5 | 5 |
| 284.167 | 15 | 24 | 5 | C15H24O5 | 4 |
| 298.146 | 15 | 22 | 6 | C15H22O6 | 5 |
| 278.156 | 16 | 22 | 4 | C16H22O4 | 6 |
| 294.151 | 16 | 22 | 5 | C16H22O5 | 6 |
| 296.167 | 16 | 24 | 5 | C16H24O5 | 5 |
| 310.146 | 16 | 22 | 6 | C16H22O6 | 6 |
| 312.162 | 16 | 24 | 6 | C16H24O6 | 5 |
| 314.178 | 16 | 26 | 6 | C16H26O6 | 4 |
| 326.141 | 16 | 22 | 7 | C16H22O7 | 6 |
| 328.157 | 16 | 24 | 7 | C16H24O7 | 5 |



|         |    |    |    |           |   |
|---------|----|----|----|-----------|---|
| 330.173 | 16 | 26 | 7  | C16H26O7  | 4 |
| 344.152 | 16 | 24 | 8  | C16H24O8  | 5 |
| 346.168 | 16 | 26 | 8  | C16H26O8  | 4 |
| 312.199 | 17 | 28 | 5  | C17H28O5  | 4 |
| 324.162 | 17 | 24 | 6  | C17H24O6  | 6 |
| 326.178 | 17 | 26 | 6  | C17H26O6  | 5 |
| 328.194 | 17 | 28 | 6  | C17H28O6  | 4 |
| 340.157 | 17 | 24 | 7  | C17H24O7  | 6 |
| 342.173 | 17 | 26 | 7  | C17H26O7  | 5 |
| 344.189 | 17 | 28 | 7  | C17H28O7  | 4 |
| 346.205 | 17 | 30 | 7  | C17H30O7  | 3 |
| 356.152 | 17 | 24 | 8  | C17H24O8  | 6 |
| 358.168 | 17 | 26 | 8  | C17H26O8  | 5 |
| 360.184 | 17 | 28 | 8  | C17H28O8  | 4 |
| 362.200 | 17 | 30 | 8  | C17H30O8  | 3 |
| 374.163 | 17 | 26 | 9  | C17H26O9  | 5 |
| 376.179 | 17 | 28 | 9  | C17H28O9  | 4 |
| 378.195 | 17 | 30 | 9  | C17H30O9  | 3 |
| 390.158 | 17 | 26 | 10 | C17H26O10 | 5 |
| 308.204 | 18 | 28 | 4  | C18H28O4  | 5 |
| 322.183 | 18 | 26 | 5  | C18H26O5  | 6 |
| 324.199 | 18 | 28 | 5  | C18H28O5  | 5 |
| 326.215 | 18 | 30 | 5  | C18H30O5  | 4 |
| 336.162 | 18 | 24 | 6  | C18H24O6  | 7 |
| 338.178 | 18 | 26 | 6  | C18H26O6  | 6 |
| 340.194 | 18 | 28 | 6  | C18H28O6  | 5 |
| 342.210 | 18 | 30 | 6  | C18H30O6  | 4 |
| 354.173 | 18 | 26 | 7  | C18H26O7  | 6 |
| 356.189 | 18 | 28 | 7  | C18H28O7  | 5 |
| 358.205 | 18 | 30 | 7  | C18H30O7  | 4 |
| 370.168 | 18 | 26 | 8  | C18H26O8  | 6 |
| 372.184 | 18 | 28 | 8  | C18H28O8  | 5 |
| 374.200 | 18 | 30 | 8  | C18H30O8  | 4 |
| 388.179 | 18 | 28 | 9  | C18H28O9  | 5 |
| 390.195 | 18 | 30 | 9  | C18H30O9  | 4 |
| 404.174 | 18 | 28 | 10 | C18H28O10 | 5 |
| 406.190 | 18 | 30 | 10 | C18H30O10 | 4 |
| 420.169 | 18 | 28 | 11 | C18H28O11 | 5 |
| 422.185 | 18 | 30 | 11 | C18H30O11 | 4 |
| 320.204 | 19 | 28 | 4  | C19H28O4  | 6 |
| 322.220 | 19 | 30 | 4  | C19H30O4  | 5 |
| 336.199 | 19 | 28 | 5  | C19H28O5  | 6 |
| 338.215 | 19 | 30 | 5  | C19H30O5  | 5 |
| 350.178 | 19 | 26 | 6  | C19H26O6  | 7 |
| 352.194 | 19 | 28 | 6  | C19H28O6  | 6 |
| 354.210 | 19 | 30 | 6  | C19H30O6  | 5 |
| 364.157 | 19 | 24 | 7  | C19H24O7  | 8 |
| 368.189 | 19 | 28 | 7  | C19H28O7  | 6 |

|         |    |    |    |           |    |
|---------|----|----|----|-----------|----|
| 370.205 | 19 | 30 | 7  | C19H30O7  | 5  |
| 378.136 | 19 | 22 | 8  | C19H22O8  | 9  |
| 380.152 | 19 | 24 | 8  | C19H24O8  | 8  |
| 384.184 | 19 | 28 | 8  | C19H28O8  | 6  |
| 386.200 | 19 | 30 | 8  | C19H30O8  | 5  |
| 388.216 | 19 | 32 | 8  | C19H32O8  | 4  |
| 396.147 | 19 | 24 | 9  | C19H24O9  | 8  |
| 400.179 | 19 | 28 | 9  | C19H28O9  | 6  |
| 400.179 | 19 | 28 | 9  | C19H28O9  | 6  |
| 402.195 | 19 | 30 | 9  | C19H30O9  | 5  |
| 404.211 | 19 | 32 | 9  | C19H32O9  | 4  |
| 416.174 | 19 | 28 | 10 | C19H28O10 | 6  |
| 350.215 | 20 | 30 | 5  | C20H30O5  | 6  |
| 352.231 | 20 | 32 | 5  | C20H32O5  | 5  |
| 366.210 | 20 | 30 | 6  | C20H30O6  | 6  |
| 368.226 | 20 | 32 | 6  | C20H32O6  | 5  |
| 370.242 | 20 | 34 | 6  | C20H34O6  | 4  |
| 378.173 | 20 | 26 | 7  | C20H26O7  | 8  |
| 382.205 | 20 | 30 | 7  | C20H30O7  | 6  |
| 384.221 | 20 | 32 | 7  | C20H32O7  | 5  |
| 386.237 | 20 | 34 | 7  | C20H34O7  | 4  |
| 394.168 | 20 | 26 | 8  | C20H26O8  | 8  |
| 398.2   | 20 | 30 | 8  | C20H30O8  | 6  |
| 400.216 | 20 | 32 | 8  | C20H32O8  | 5  |
| 402.232 | 20 | 34 | 8  | C20H34O8  | 4  |
| 416.211 | 20 | 32 | 9  | C20H32O9  | 5  |
| 390.173 | 21 | 26 | 7  | C21H26O7  | 9  |
| 420.199 | 26 | 28 | 5  | C26H28O5  | 13 |
| 422.215 | 26 | 30 | 5  | C26H30O5  | 12 |
| 438.21  | 26 | 30 | 6  | C26H30O6  | 12 |

\* DBE = double bond equivalent

**Table S5.** Products identified in the mass spectrum were obtained from the fast  $\alpha$ -pinene ozonolysis experiment.

| Name            | No. of C atom | Chemical formula                              | m/z        | Proposed structure                                                                   | Reference                   |
|-----------------|---------------|-----------------------------------------------|------------|--------------------------------------------------------------------------------------|-----------------------------|
| <b>O2</b>       |               |                                               |            |                                                                                      |                             |
| Norpinoaldehyde | 9             | C <sub>9</sub> H <sub>14</sub> O <sub>2</sub> | 153.0<br>9 | 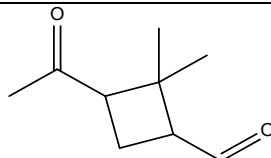   | Witkowski and Gieczak, 2014 |
| C96OH           | 9             | C <sub>9</sub> H <sub>16</sub> O <sub>2</sub> | 155.1<br>1 |    | MCM                         |
| Pinaldehyde     | 10            | C <sub>10</sub> H <sub>16</sub> O<br>2        | 167.1<br>1 |    | Witkowski and Gieczak, 2014 |
| Pinanediol      | 10            | C <sub>10</sub> H <sub>18</sub> O<br>2        | 169.1<br>2 |   | MCM                         |
| <b>O3</b>       |               |                                               |            |                                                                                      |                             |
| Norpinalic acid | 8             | C <sub>8</sub> H <sub>12</sub> O <sub>3</sub> | 155.0<br>7 |  | Ma and Marston, 2008        |
| Pinalic acid    | 9             | C <sub>9</sub> H <sub>14</sub> O <sub>3</sub> | 169.0<br>9 |  | Witkowski and Gieczak, 2014 |
| Pinonic acid    | 10            | C <sub>10</sub> H <sub>16</sub> O<br>3        | 183.1<br>0 |  | Jenkin et al., 2000         |
| <b>O4</b>       |               |                                               |            |                                                                                      |                             |
| Terebic acid    | 7             | C <sub>7</sub> H <sub>10</sub> O <sub>4</sub> | 157.0<br>5 |  | Yasmeen et al., 2010        |
| Terpenylic acid | 8             | C <sub>8</sub> H <sub>12</sub> O <sub>4</sub> | 171.0<br>6 |  | Claeys et al., 2009         |

|               |   |                                               |            |                                                                                    |                      |
|---------------|---|-----------------------------------------------|------------|------------------------------------------------------------------------------------|----------------------|
| Norpinic acid | 8 | C <sub>8</sub> H <sub>12</sub> O <sub>4</sub> | 171.0<br>6 | 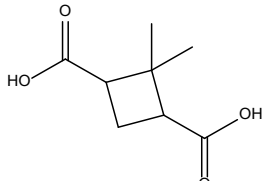 | Ma and Marston, 2008 |
| Pinic acid    | 9 | C <sub>9</sub> H <sub>14</sub> O <sub>4</sub> | 185.0<br>8 |  | Ma and Marston, 2008 |

| Name                                            | No. of C atom | Chemical formula                              | m/z        | Proposed structure                                                                   | Reference            |
|-------------------------------------------------|---------------|-----------------------------------------------|------------|--------------------------------------------------------------------------------------|----------------------|
| 4-hydroxy-pinalic-3-acid                        | 9             | C <sub>9</sub> H <sub>14</sub> O <sub>4</sub> | 185.0<br>8 | 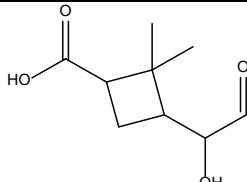   | Ma and Marston, 2008 |
| Oxopinonic acid                                 | 10            | C <sub>10</sub> H <sub>14</sub> O<br>4        | 197.0<br>8 |    | Zhang et al., 2015   |
| OH-pinonic acid                                 | 10            | C <sub>10</sub> H <sub>16</sub> O<br>4        | 199.0<br>9 |  | Jenkin et al., 2000  |
| <b>O5</b>                                       |               |                                               |            |                                                                                      |                      |
| Diaterpenylic acid                              | 8             | C <sub>8</sub> H <sub>14</sub> O <sub>5</sub> | 189.0<br>7 |  | Yasmeen et al., 2010 |
| C9-Carbonyl dicarboxylic acid                   | 9             | C <sub>9</sub> H <sub>14</sub> O <sub>5</sub> | 201.0<br>7 |  | Sato et al., 2016    |
| <b>O6</b>                                       |               |                                               |            |                                                                                      |                      |
| 3-methyl-1,2,3-butanetricarboxylic acid (MBTCA) | 8             | C <sub>8</sub> H <sub>12</sub> O <sub>6</sub> | 203.0<br>6 |  | Claeys et al., 2009  |
| Diaterpenylic acid acetate                      | 10            | C <sub>10</sub> H <sub>16</sub> O<br>6        | 231.0<br>9 |  | Yasmeen et al., 2010 |

| Dimer                                                     | m/z    | structure | Reference                   |
|-----------------------------------------------------------|--------|-----------|-----------------------------|
| Aldol reaction products of pinonic acid and pinonaldehyde | 337.21 |           | Witkowski and Gieczak, 2014 |
| Dimer ester of pinic acid and diaterpenylic acid          | 357.16 |           | Yasmeen et al., 2010        |
| Dimer ester of pinic acid and 10-hydroxypinonic acid      | 367.18 |           | Yasmeen et al., 2010        |
| Dimer ester of pinic acid and SCI                         | 369.20 |           | Witkowski and Gieczak, 2014 |

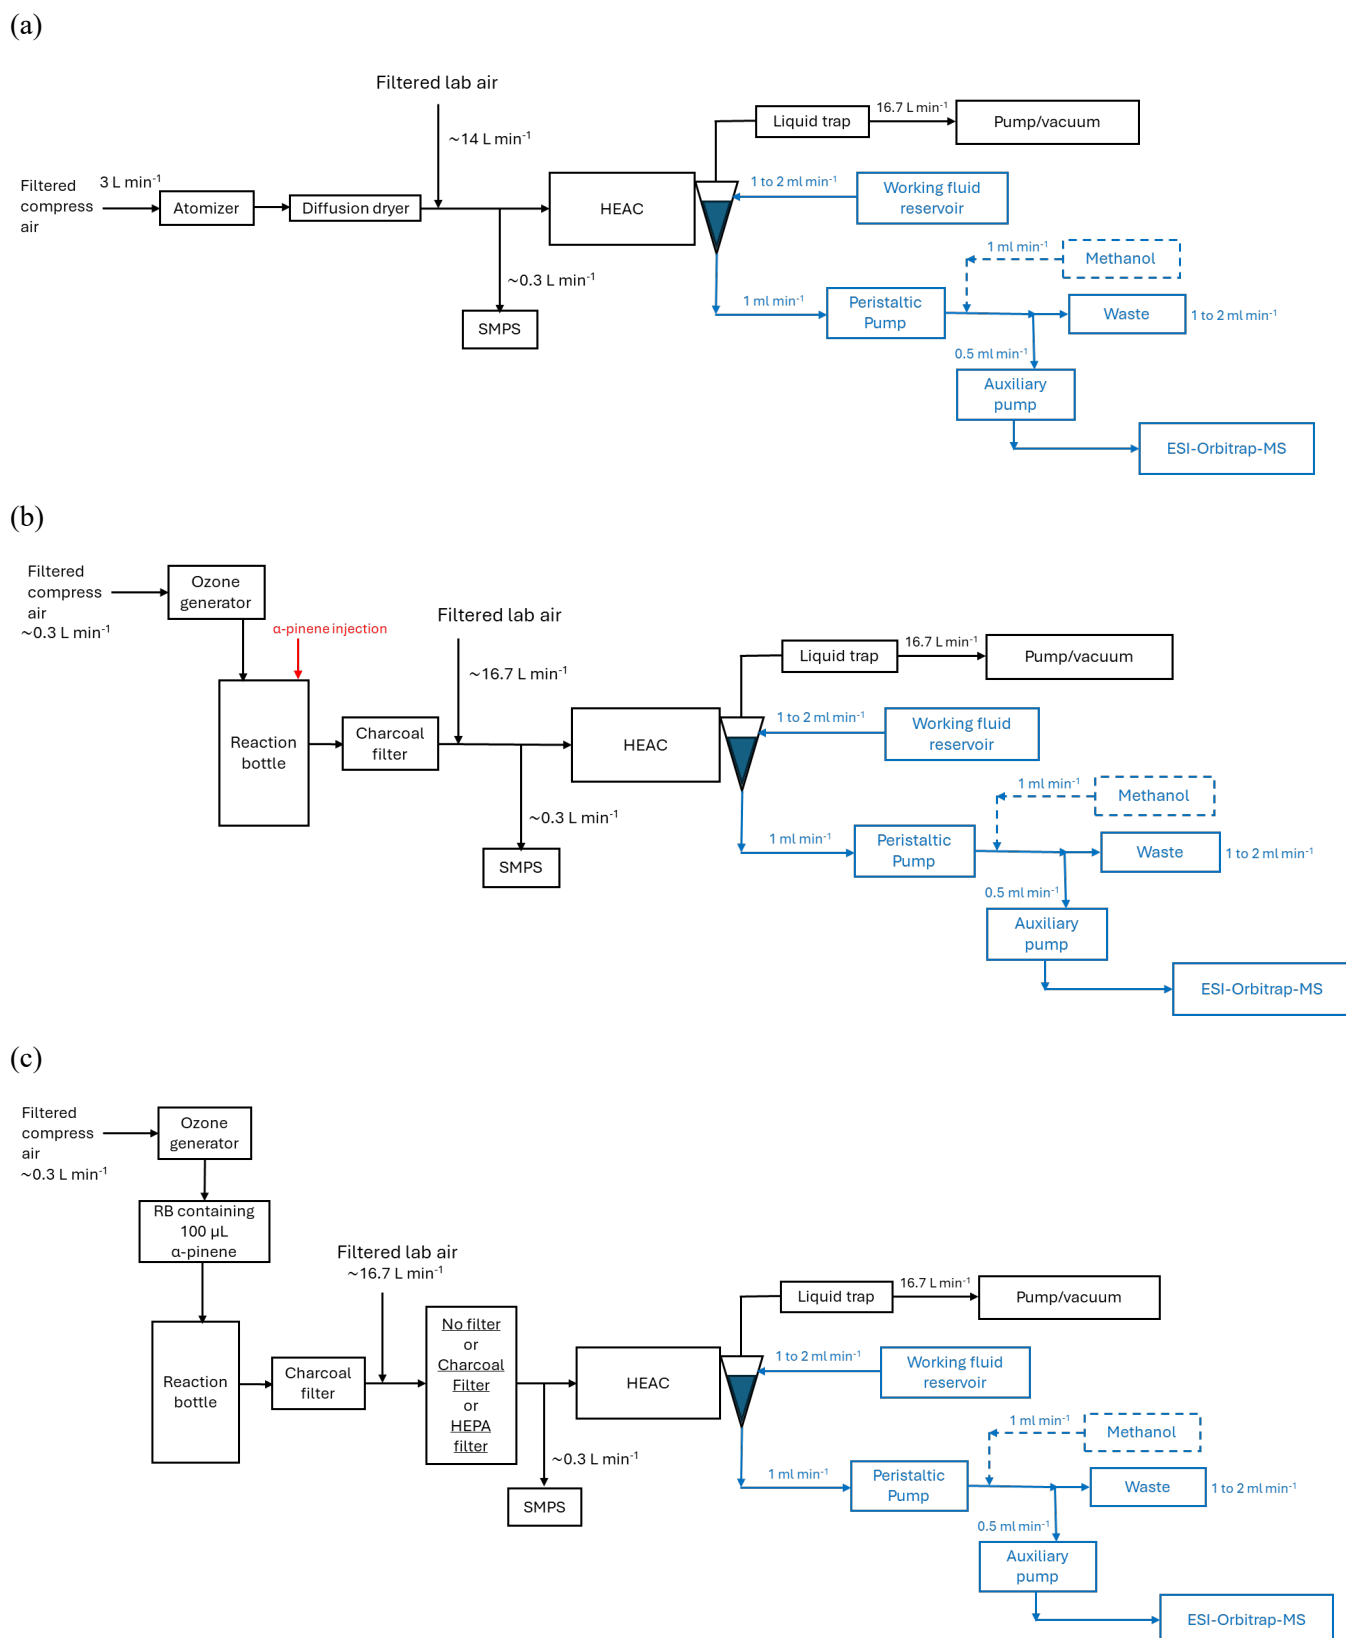

**Figure S1.** Instrumental setup for (a) sensitivity and LOD characterisation experiments, (b) fast  $\alpha$ -pinene injection experiment and (c) slow  $\alpha$ -pinene injection experiment. Air supplied to the system was filtered by activated charcoal and HEPA filters. Dash lines indicate the additional setup when using Milli-Q water as the working fluid.

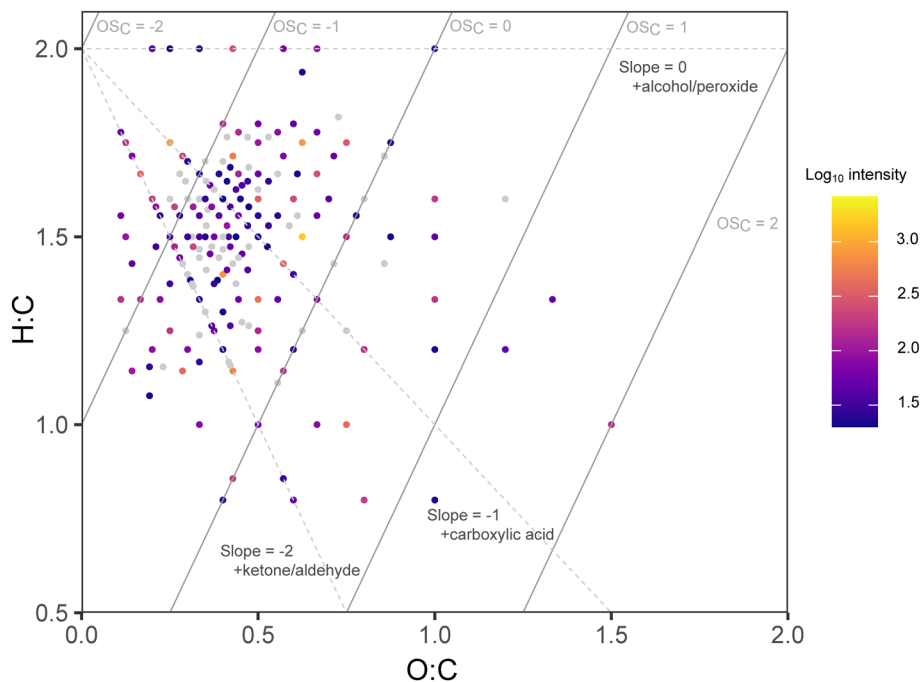

**Figure S2.** Van Krevelen diagram of the ozonolysis products in the fast  $\alpha$ -pinene injection experiment. The data in this figure correspond to the moment when the particle mass concentration peaked. Coloured points represent data with signal intensities  $> \text{Log } 1.5$ , while light-grey points represent data with a signal intensity  $< \text{Log } 1.5$ . OSC corresponds to the averaged oxidation state of a compound as describe in Kroll et al. (2011).

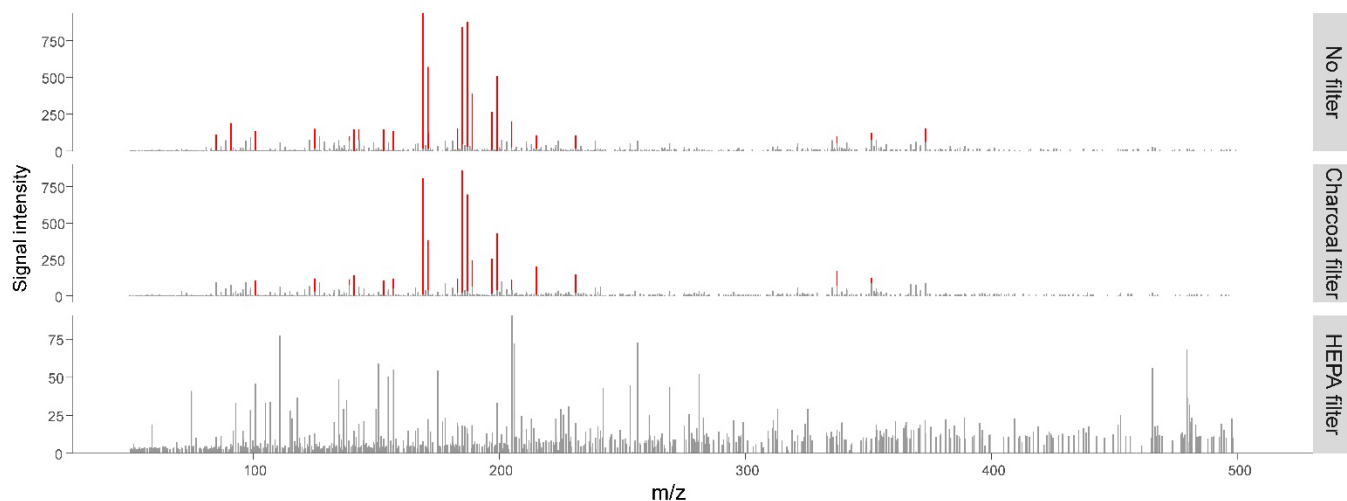

**Figure S3.** The mass spectrum obtained from the slow  $\alpha$ -pinene injection experiment when the particle concentration was the highest. Peaks with signal intensity larger than 100 were highlighted in red. Note that the y-axis scale of HEPA filter is 10 times lower than the other two filters.

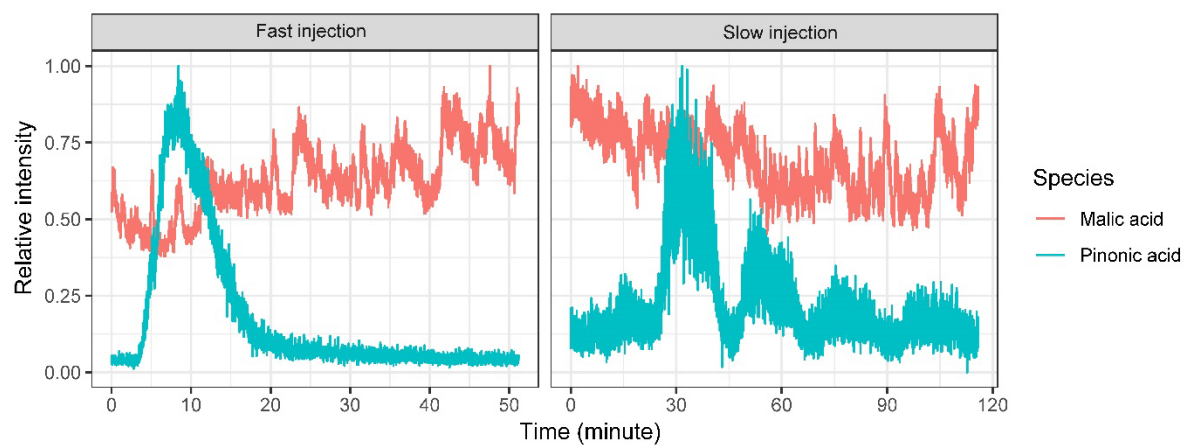

**Figure S4.** Relative signal intensities of malic acid (internal standard) and pinonic acid (reaction product) in fast and slow  $\alpha$ -pinene injection experiments. The relative signal intensity was calculated by normalizing the signal intensity of each data point to the highest signal intensity in the whole experiment.



## Reference

- HE, L., DIEDRICH, J., CHU, Y.-Y. & YATES, J. R., III 2015. Extracting Accurate Precursor Information for Tandem Mass Spectra by RawConverter. *Analytical Chemistry*, 87, 11361-11367.
- KROLL, J. H., DONAHUE, N. M., JIMENEZ, J. L., KESSLER, S. H., CANAGARATNA, M. R., WILSON, K. R., ALTIERI, K. E., MAZZOLENI, L. R., WOZNIAK, A. S., BLUHM, H., MYSAK, E. R., SMITH, J. D., KOLB, C. E. & WORSNOP, D. R. 2011. Carbon oxidation state as a metric for describing the chemistry of atmospheric organic aerosol. *Nature Chemistry*, 3, 133-139.
- R DEVELOPMENT CORE TEAM 2023. R: A language and environment for statistical computing. R Foundation for Statistical Computing.
- SMITH, C. A., WANT, E. J., O'MAILLE, G., ABAGYAN, R. & SIUZDAK, G. 2006. XCMS: Processing Mass Spectrometry Data for Metabolite Profiling Using Nonlinear Peak Alignment, Matching, and Identification. *Analytical Chemistry*, 78, 779-787.
- VERMEESCH, P. 2018. IsoplotR: A free and open toolbox for geochronology. *Geoscience Frontiers*, 9, 1479-1493.
- WICKHAM, H. 2016. Data Analysis. In: WICKHAM, H. (ed.) *ggplot2: Elegant Graphics for Data Analysis*. Cham: Springer International Publishing.
- YORK, D., EVENSEN, N. M., MARTÍNEZ, M. L. & DE BASABE DELGADO, J. 2004. Unified equations for the slope, intercept, and standard errors of the best straight line. *American Journal of Physics*, 72, 367-375.
- ZHANG, X., DALLESKA, N. F., HUANG, D. D., BATES, K. H., SOROOSHIAN, A., FLAGAN, R. C. & SEINFELD, J. H. 2016. Time-resolved molecular characterization of organic aerosols by PILS + UPLC/ESI-Q-TOFMS. *Atmospheric Environment*, 130, 180-189.
